# Supplementary material for: Anti-Islet Autoantibodies in Type 1 Diabetes
Source: Preprints.org preprint supplement (doi:10.20944/preprints202305.0196.v1), 2023-05-04
Supplement: Supplementary file 2 [file supplementary]

**Table 1 Disease specificity of GAD autoantibodies**

| Subject                                   | Prevalence |
|-------------------------------------------|------------|
| Healthy control                           | < 1%       |
| Acute-onset type 1 diabetes (at onset)    | 60~80%     |
| Fulminant type 1 diabetes                 | 5~9%       |
| LADA (SPIDDM)                             | 100%       |
| Type 2 diabetes (diet/OHA)                | 4~5%       |
| Polyglandular autoimmune syndrome, type 1 | 30~40%     |
| Polyglandular autoimmune syndrome, type 2 | 30~50%     |
| Autoimmune thyroid disease                | 6~8%       |
| Stiff-person syndrome                     | 60~70%     |

LADA, latent-autoimmune diabetes in adults; SPIDDM, slowly progressive insulin-dependent diabetes; OHA, oral hypoglycemic agents
