# Supplementary material for: Anti-Islet Autoantibodies in Type 1 Diabetes
Source: Preprints.org preprint supplement (doi:10.20944/preprints202305.0196.v1), 2023-05-04
Supplement: Supplementary file 3 [file supplementary]

Archive with 13 entries (11 files):
- figures and Table/
- figures and Table/Figures/
- figures and Table/Figures/Figure 1.TIF
- figures and Table/Figures/Figure 2.TIF
- figures and Table/Figures/Figure 3A,B.TIF
- figures and Table/Figures/Figure 3C.TIF
- figures and Table/Figures/Figure 4A.TIF
- figures and Table/Figures/Figure 4B.TIF
- figures and Table/Figures/Figure 4C.TIF
- figures and Table/Figures/Figure 5.TIF
- figures and Table/Figures/Figure 6.TIF
- figures and Table/Table 1.pdf
- figures and Table/Table 2.pdf
