# Supplementary figures and images for: Anti-Islet Autoantibodies in Type 1 Diabetes
Source: Preprints.org preprint supplement (doi:10.20944/preprints202305.0196.v1), 2023-05-04

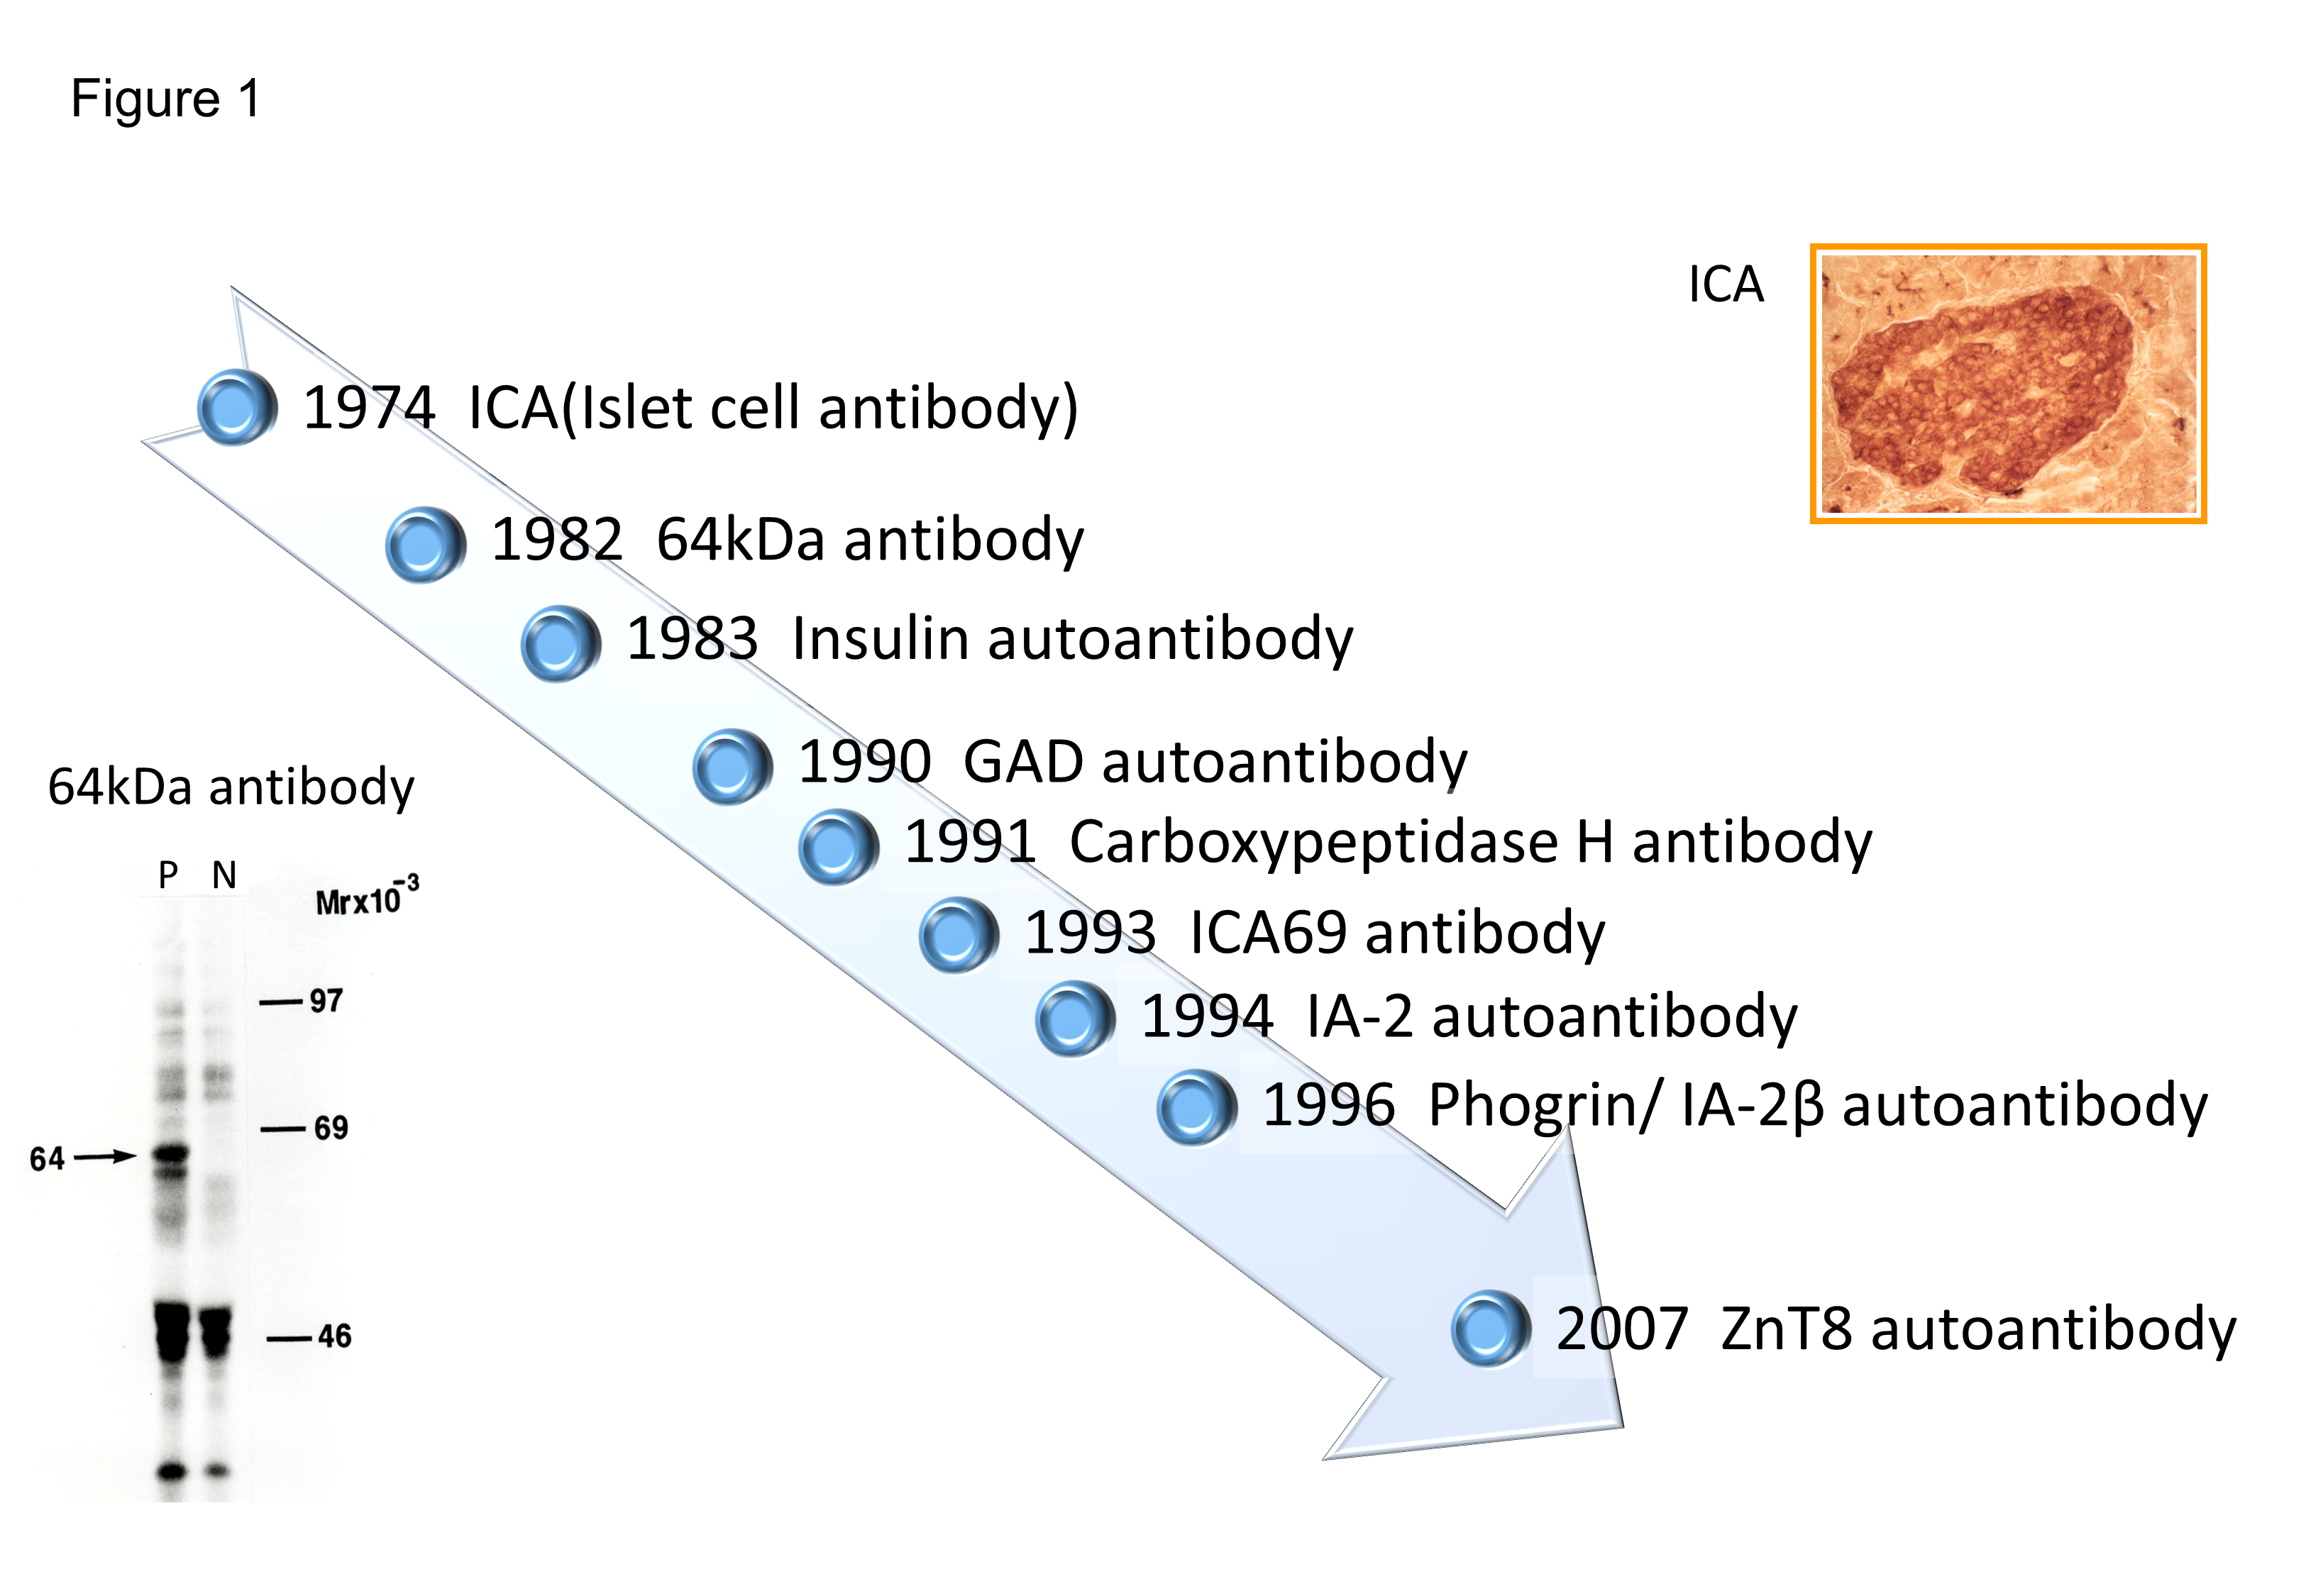

Supplement: Supplementary file 3 [file supplementary › figures and Table/Figures/Figure 1.TIF]

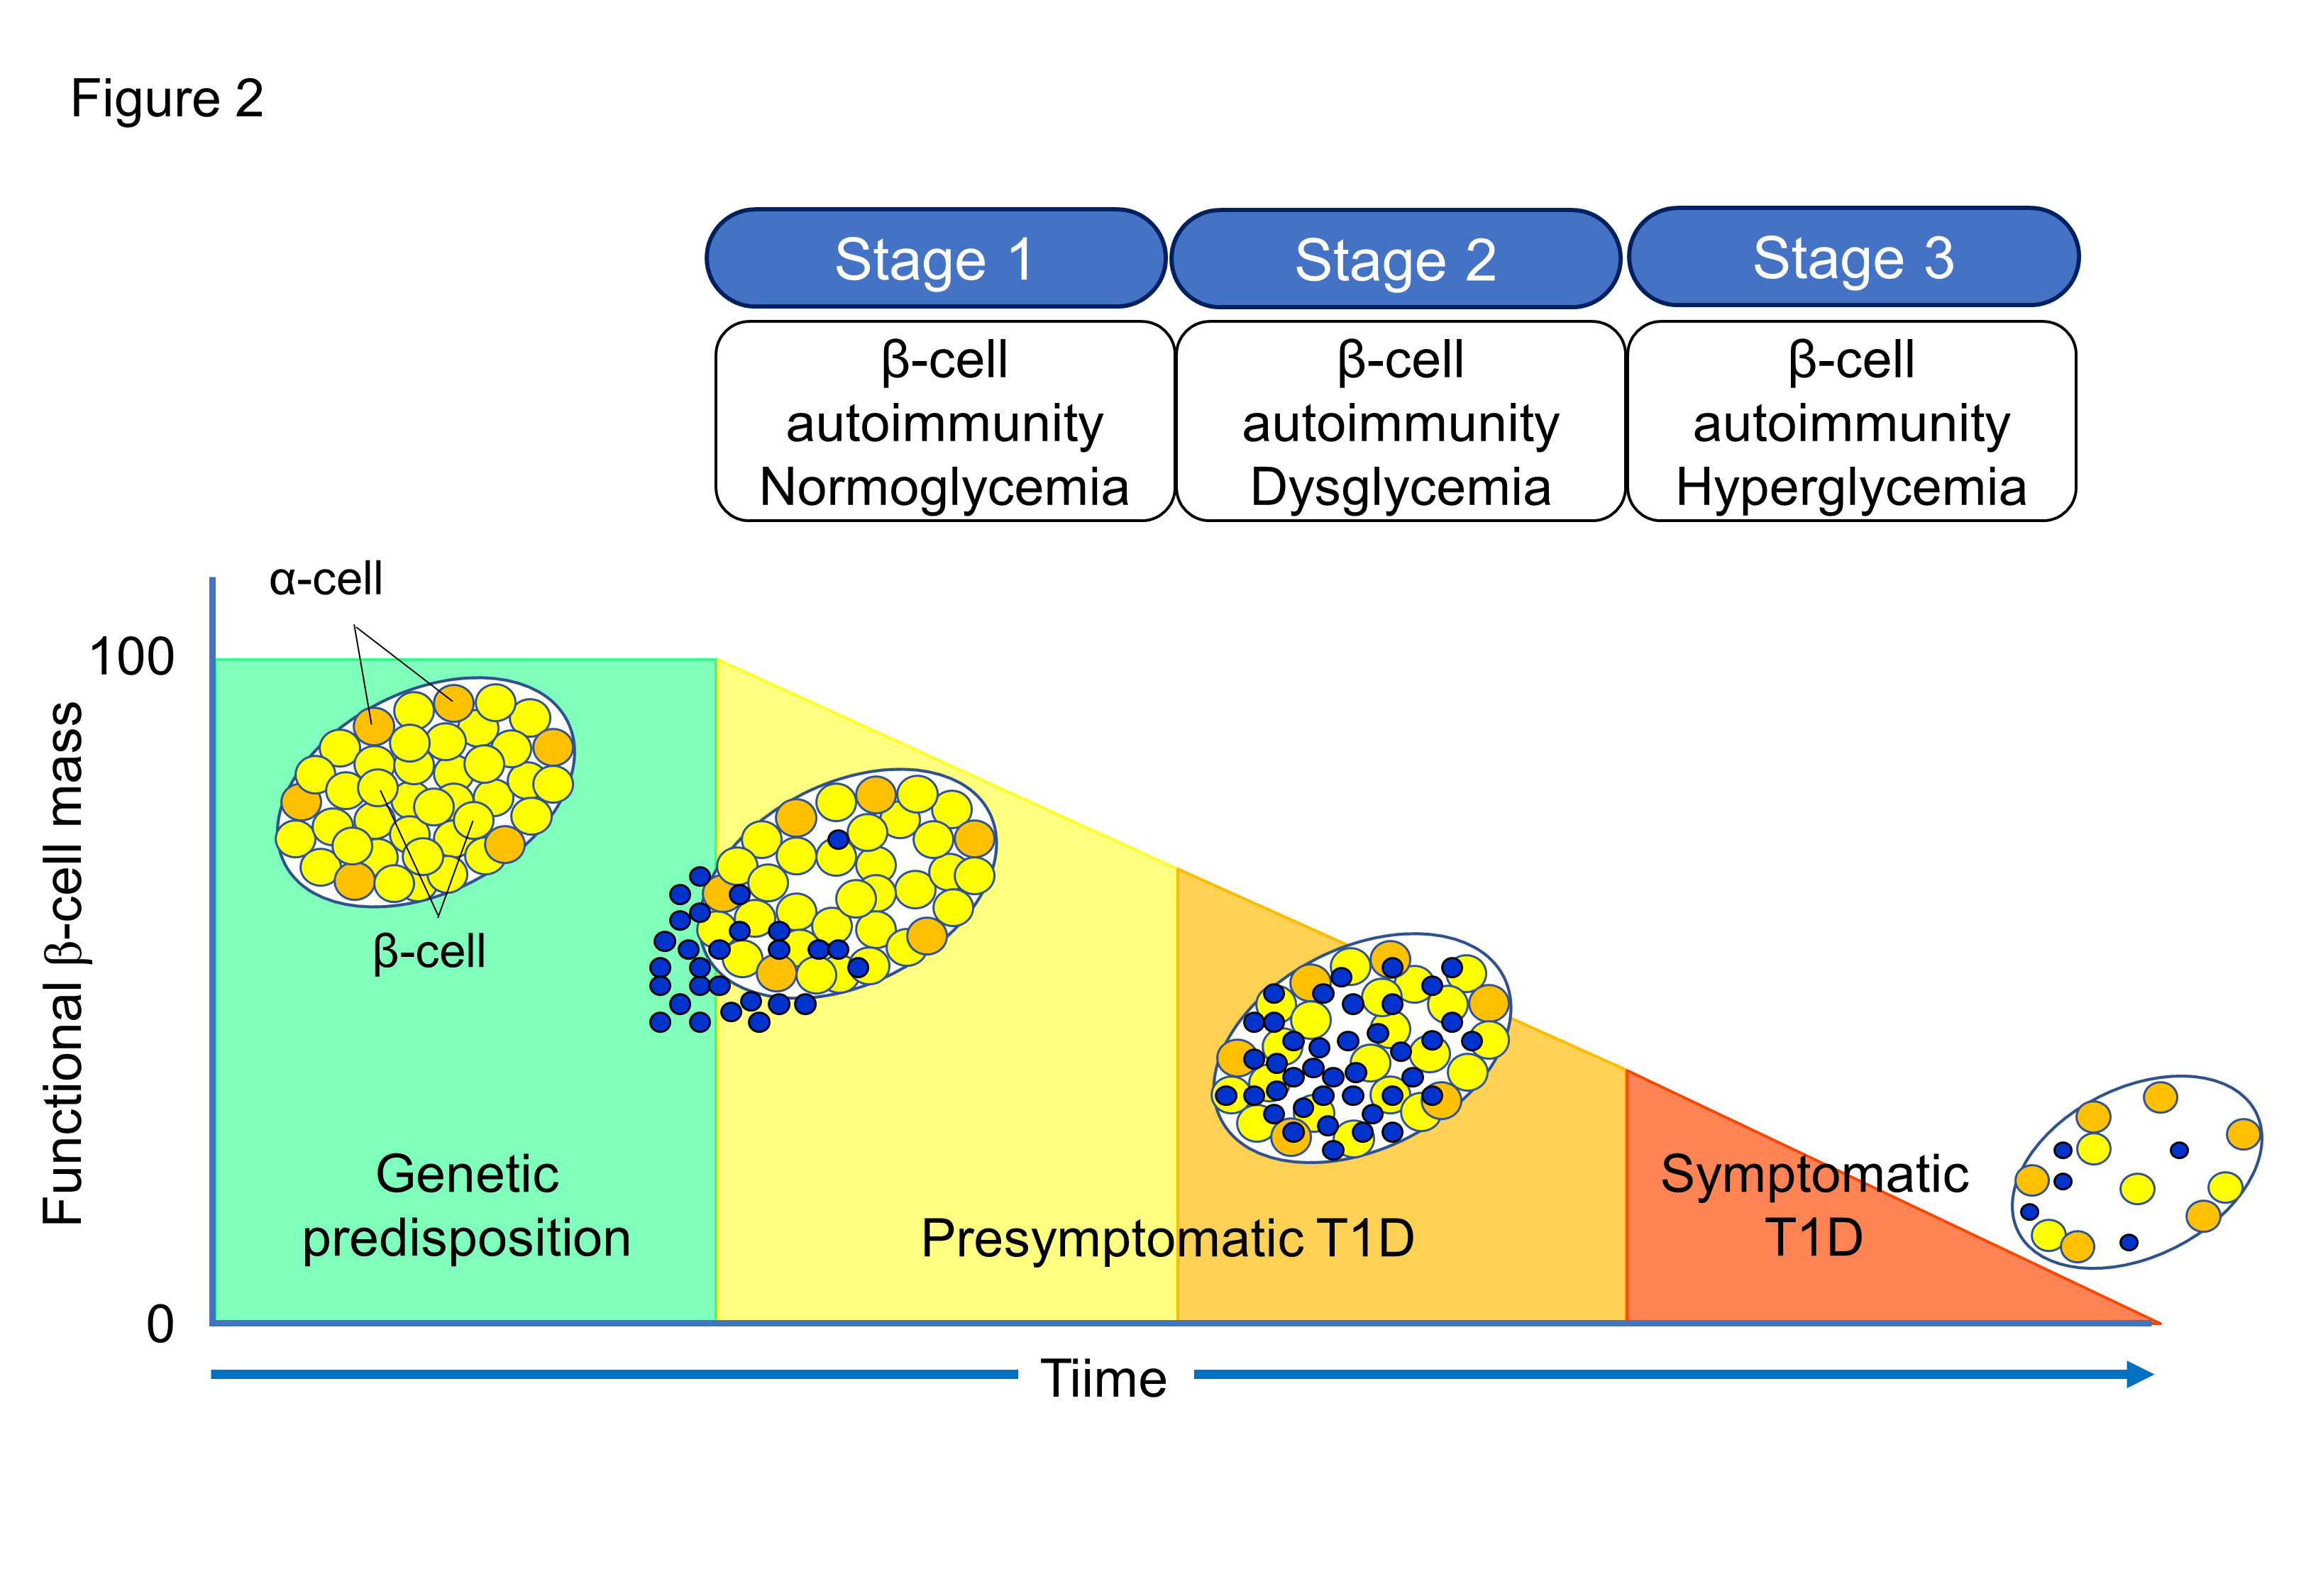

Supplement: Supplementary file 3 [file supplementary › figures and Table/Figures/Figure 2.TIF]

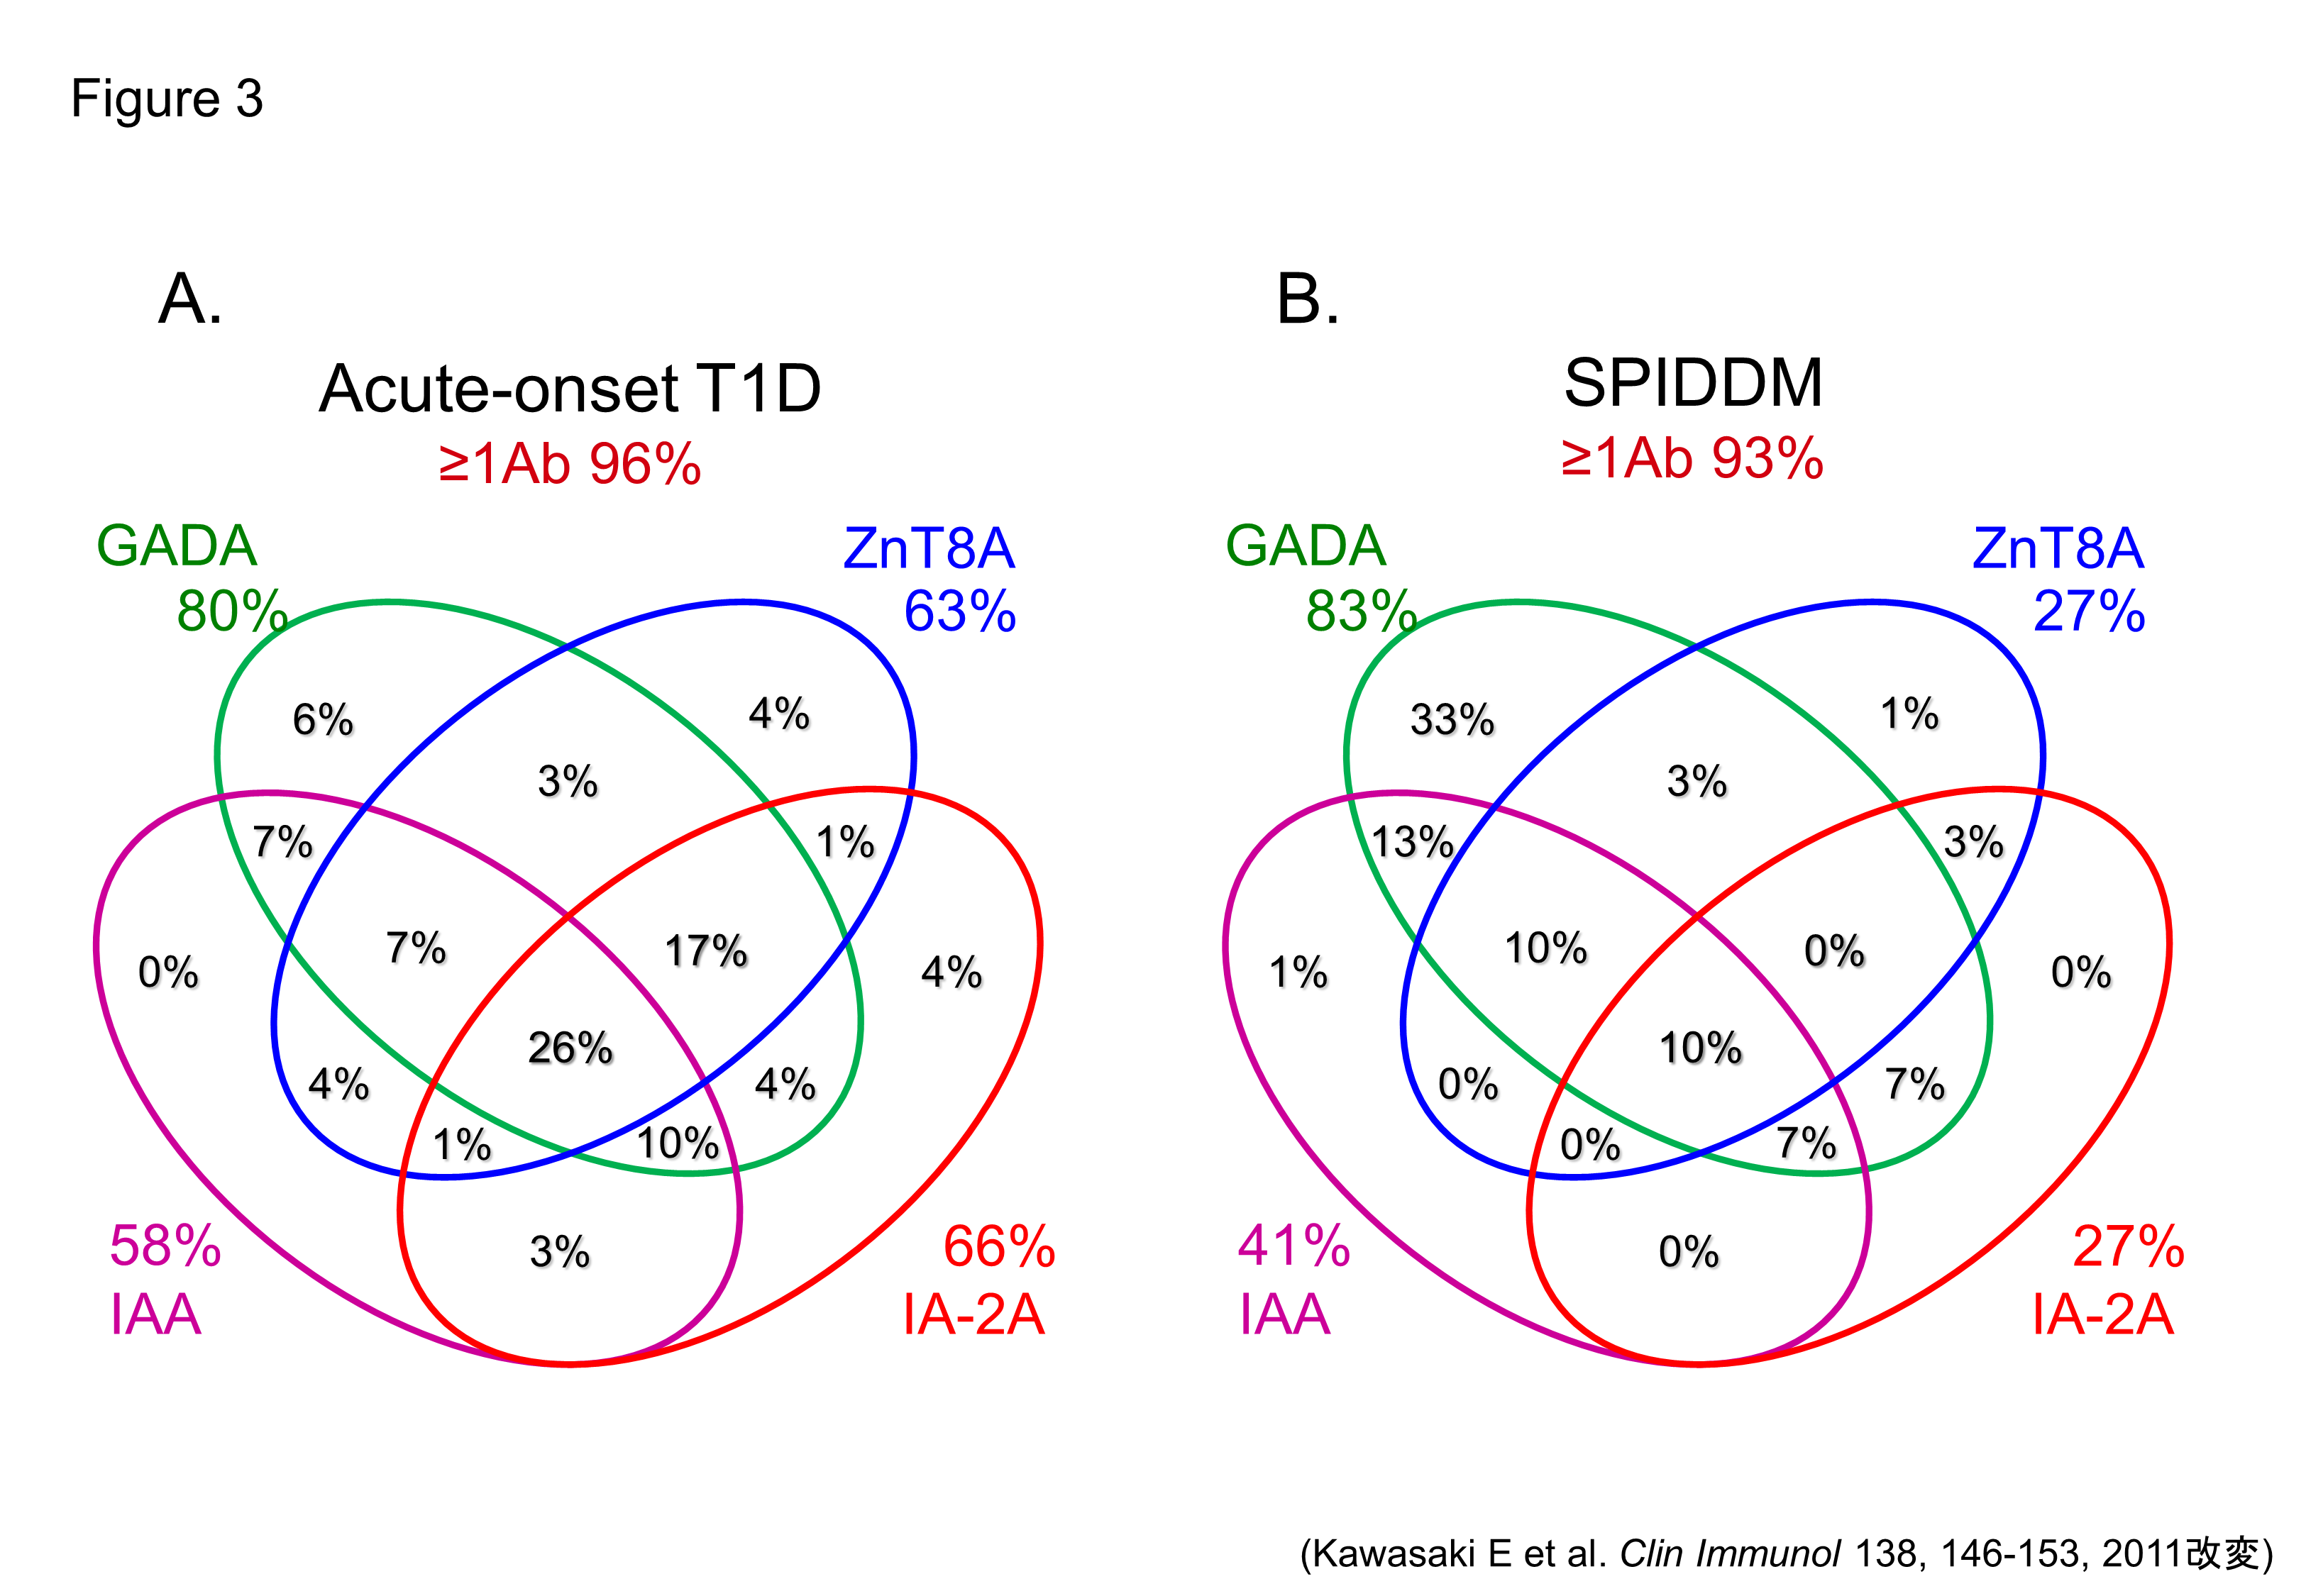

Supplement: Supplementary file 3 [file supplementary › figures and Table/Figures/Figure 3A,B.TIF]

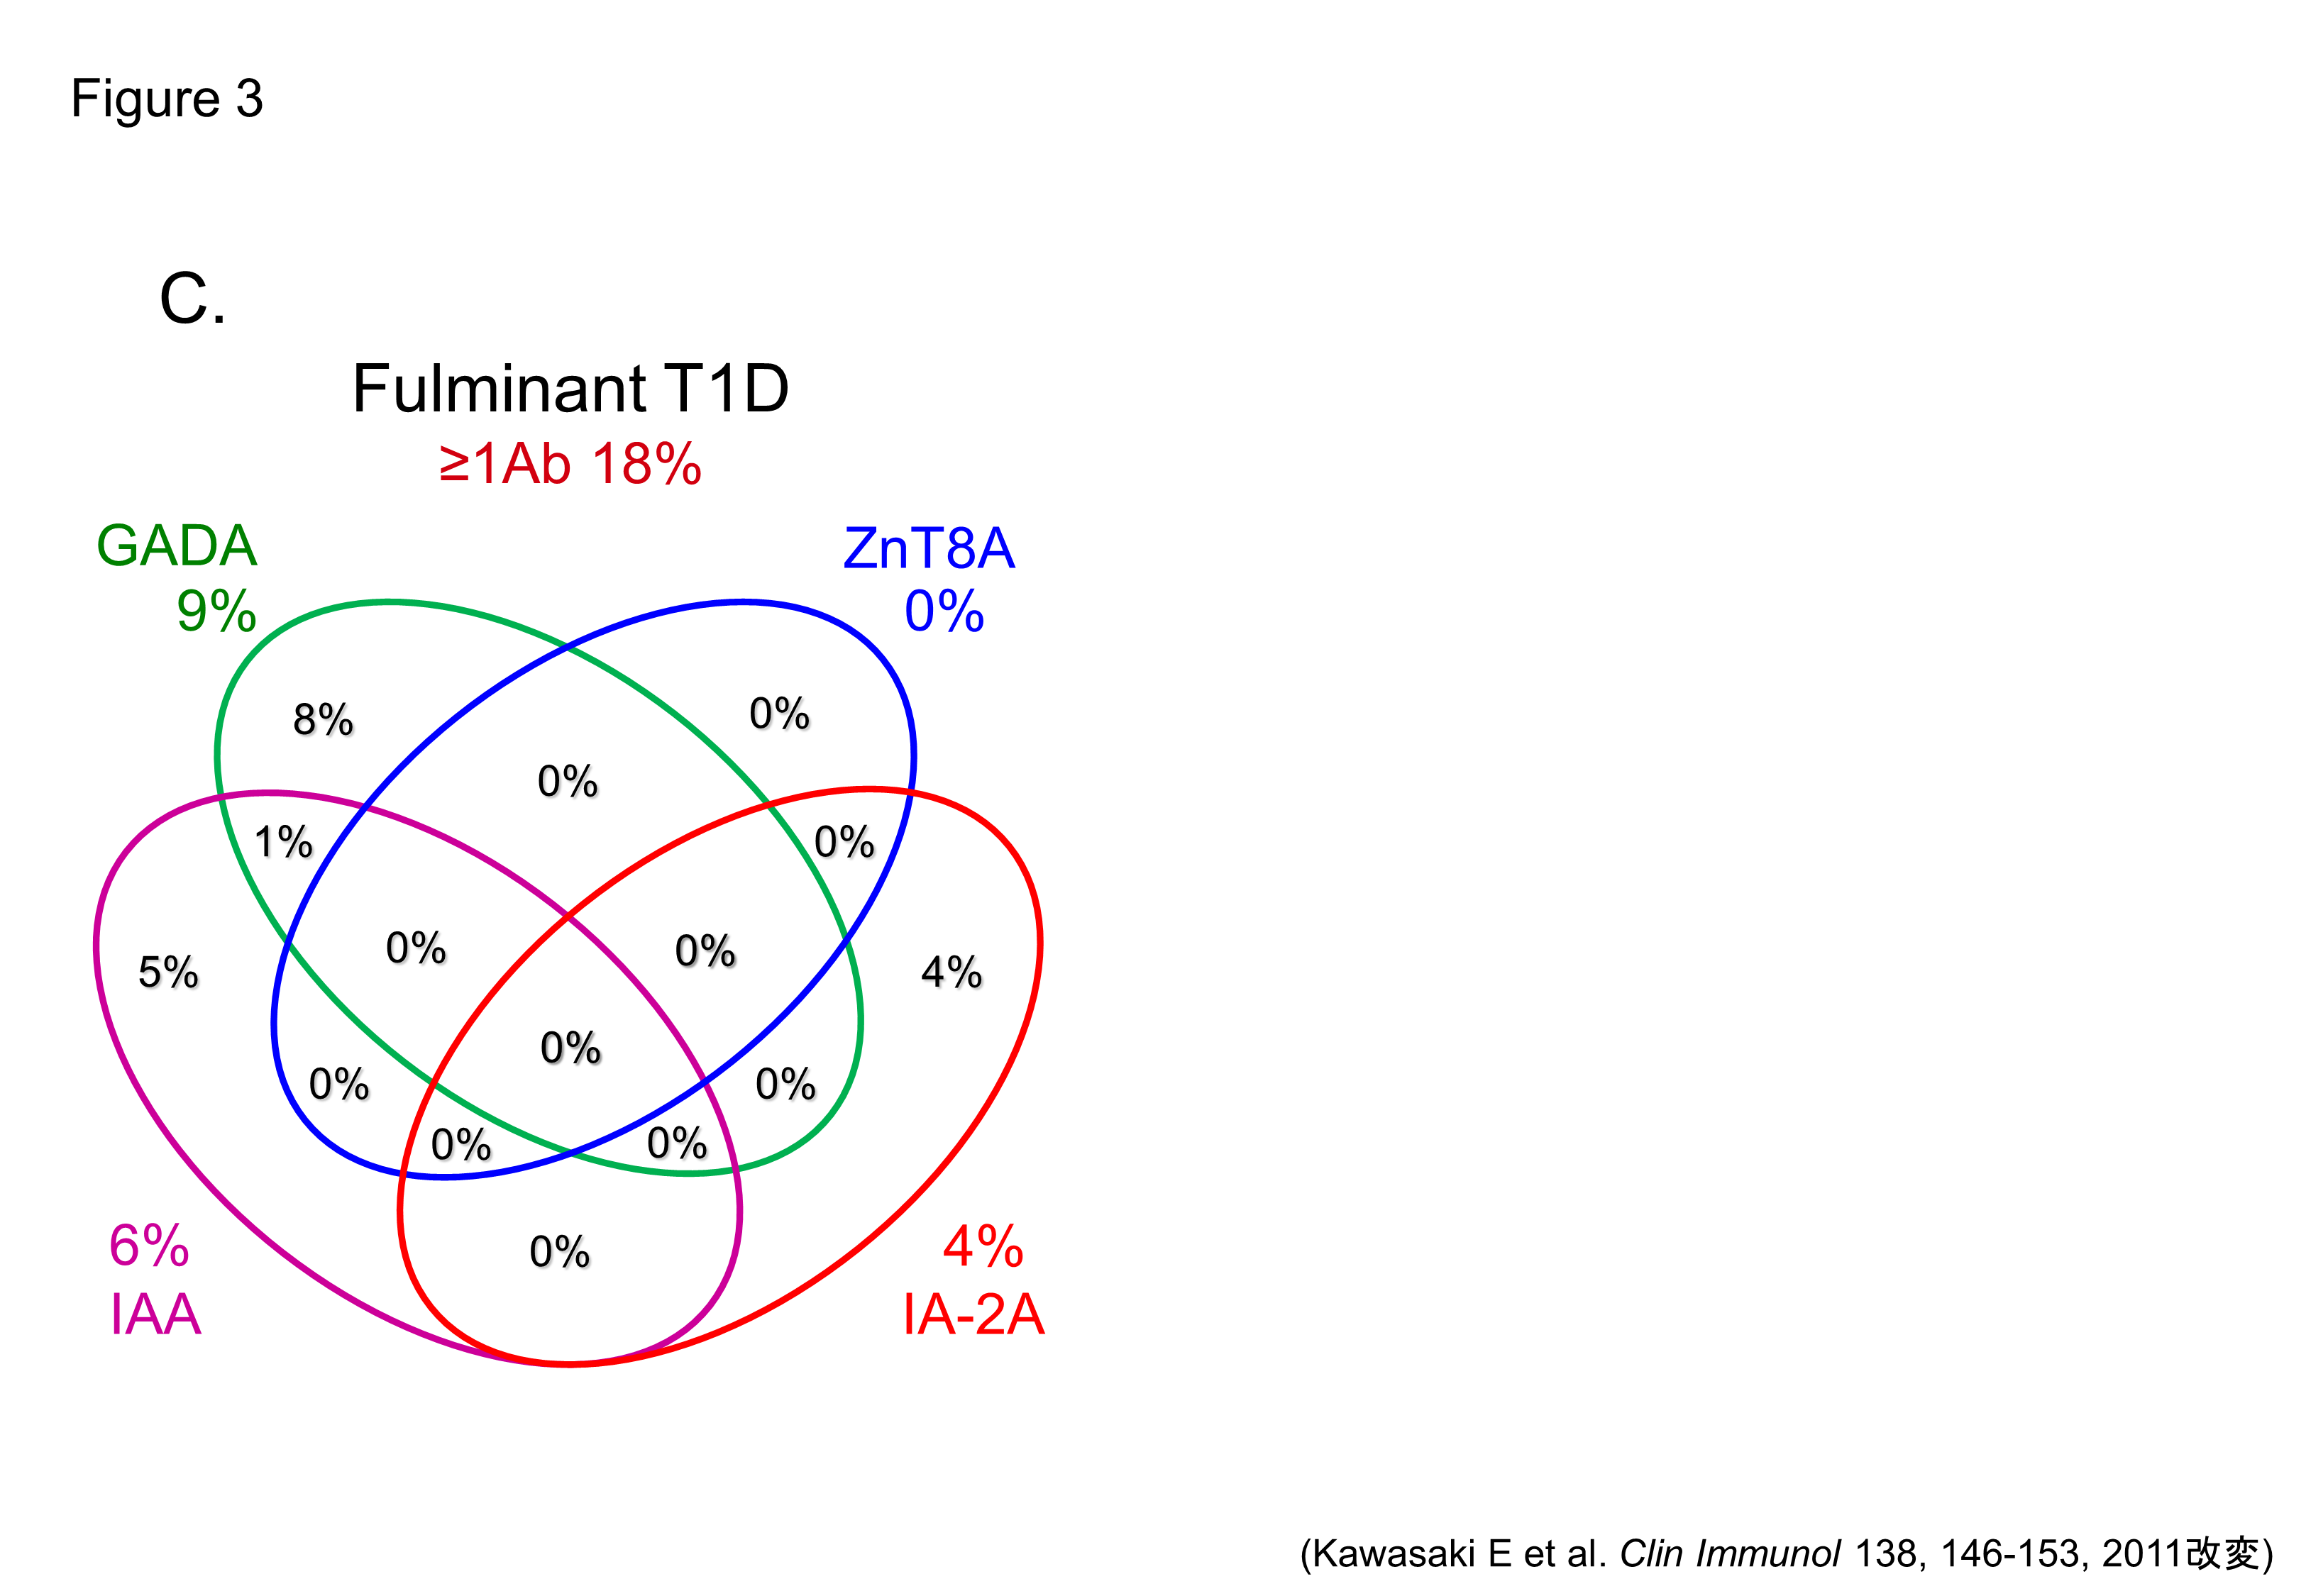

Supplement: Supplementary file 3 [file supplementary › figures and Table/Figures/Figure 3C.TIF]

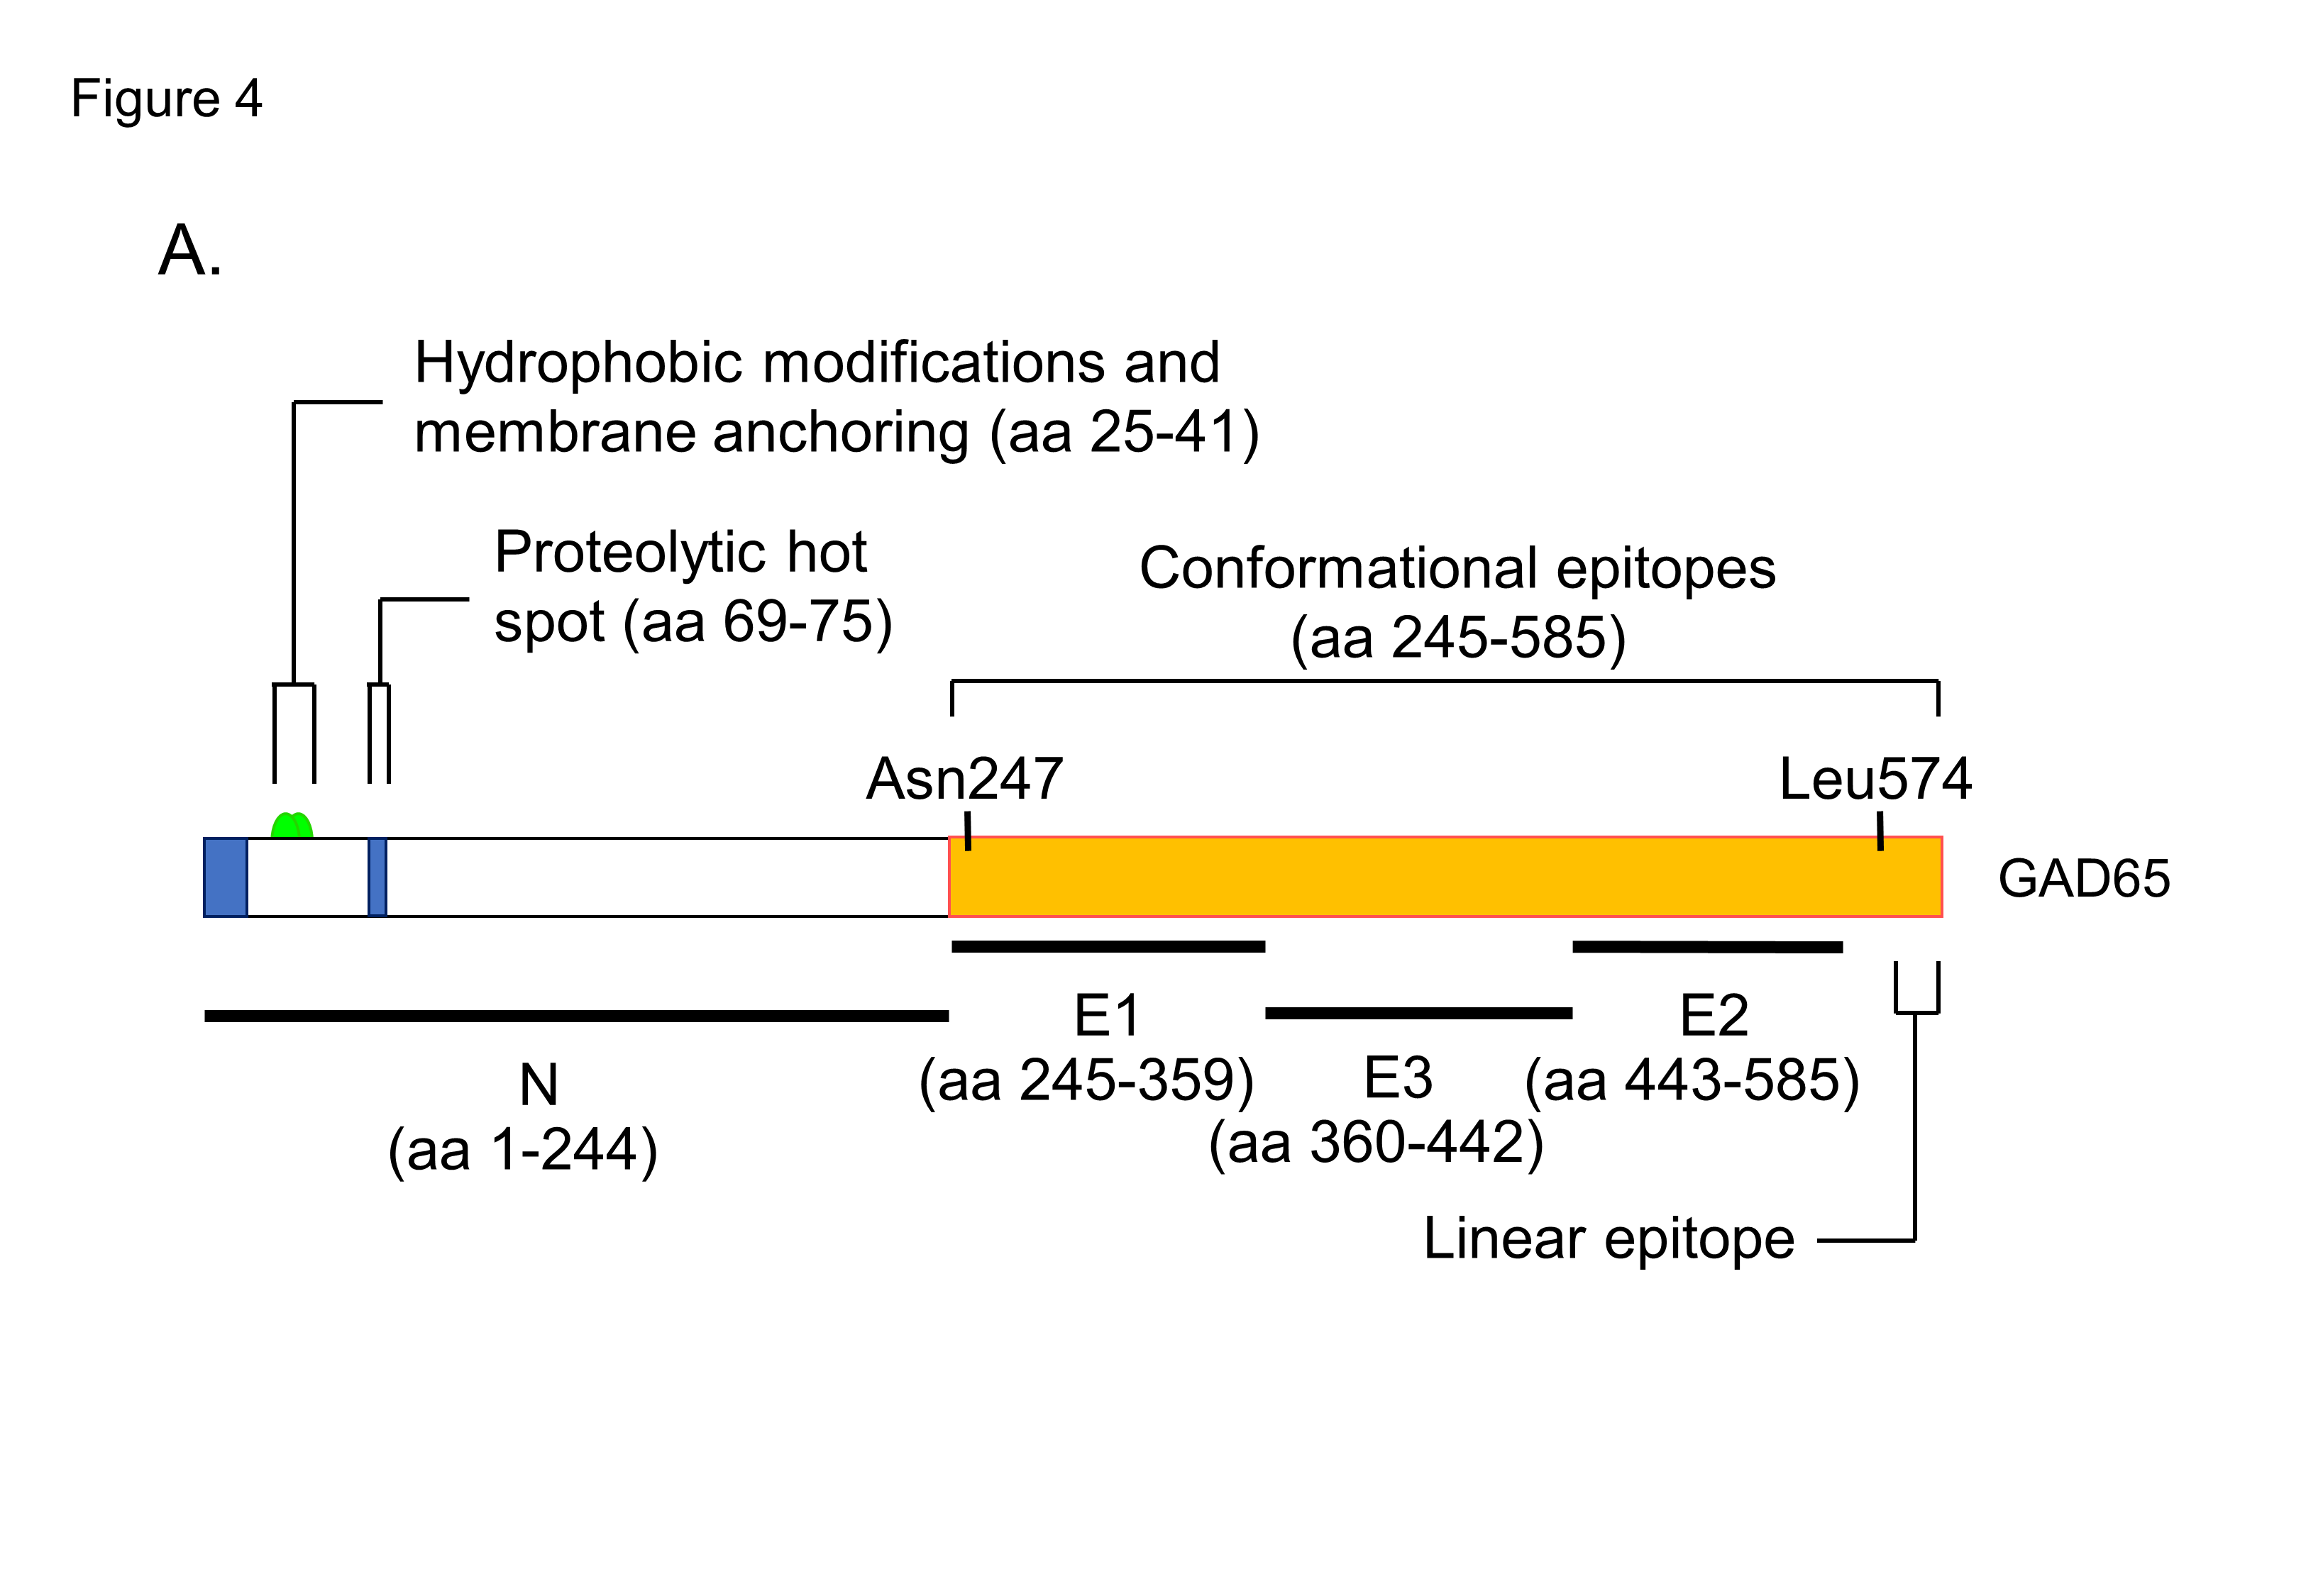

Supplement: Supplementary file 3 [file supplementary › figures and Table/Figures/Figure 4A.TIF]

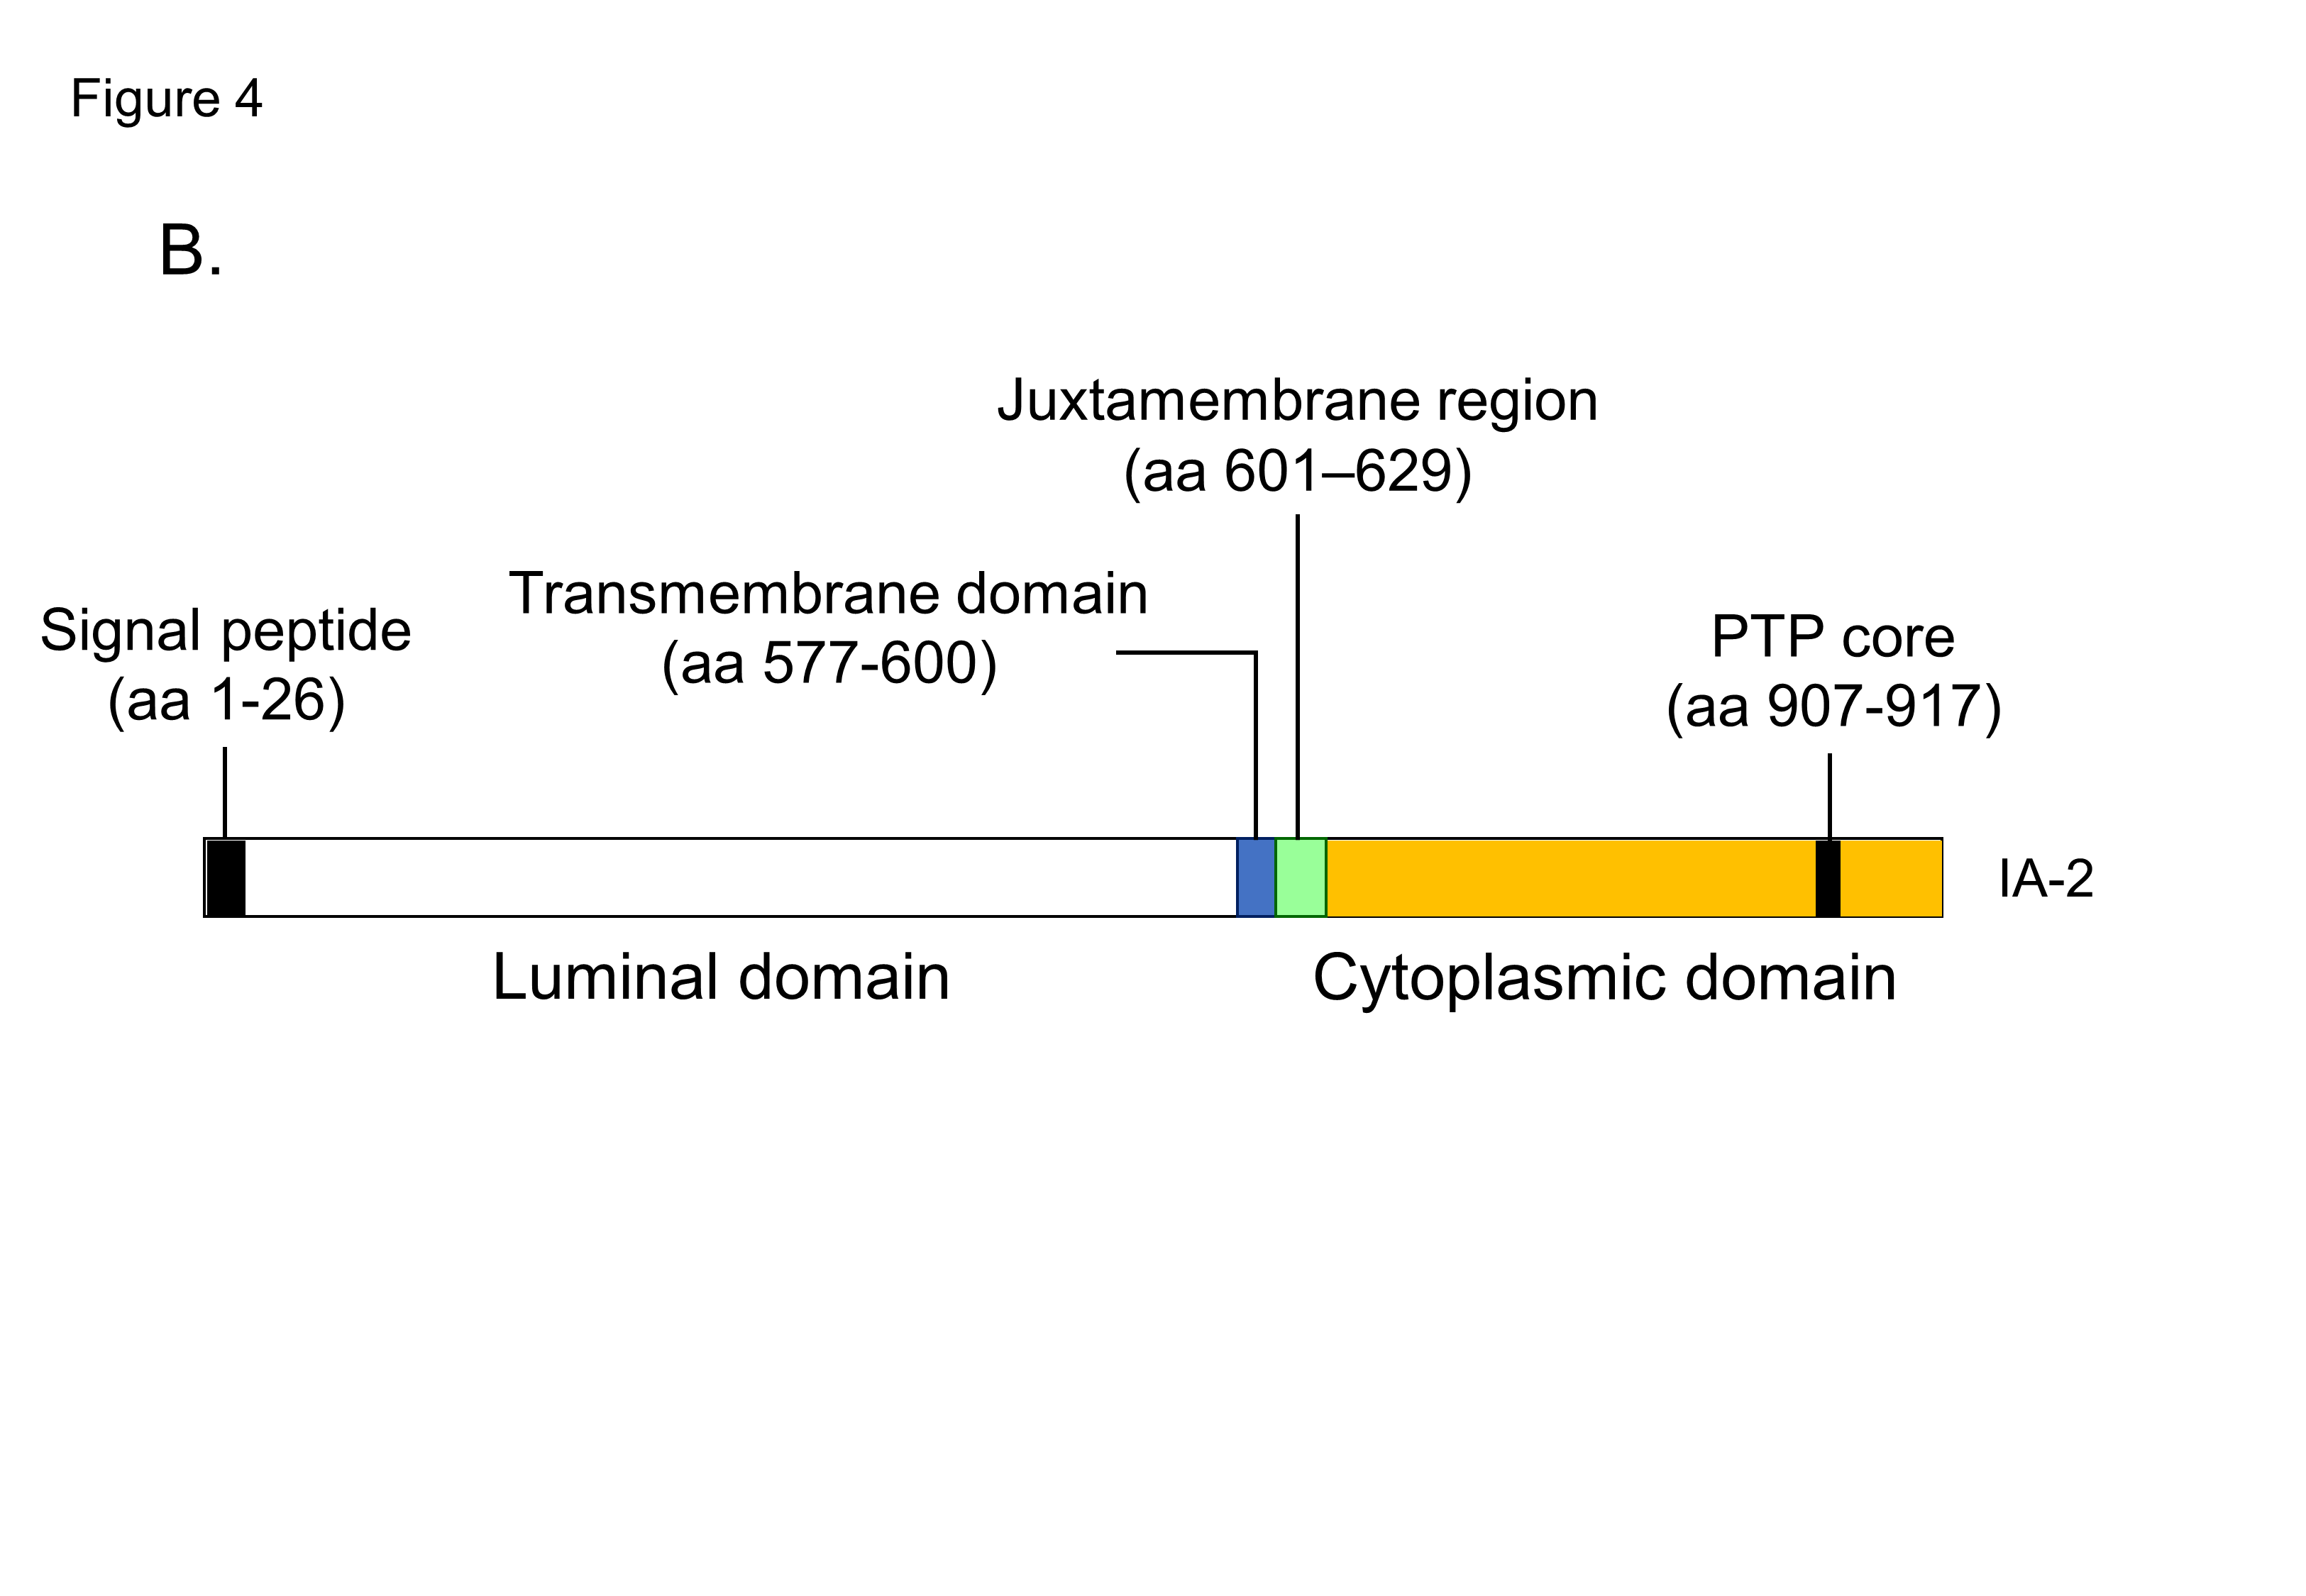

Supplement: Supplementary file 3 [file supplementary › figures and Table/Figures/Figure 4B.TIF]

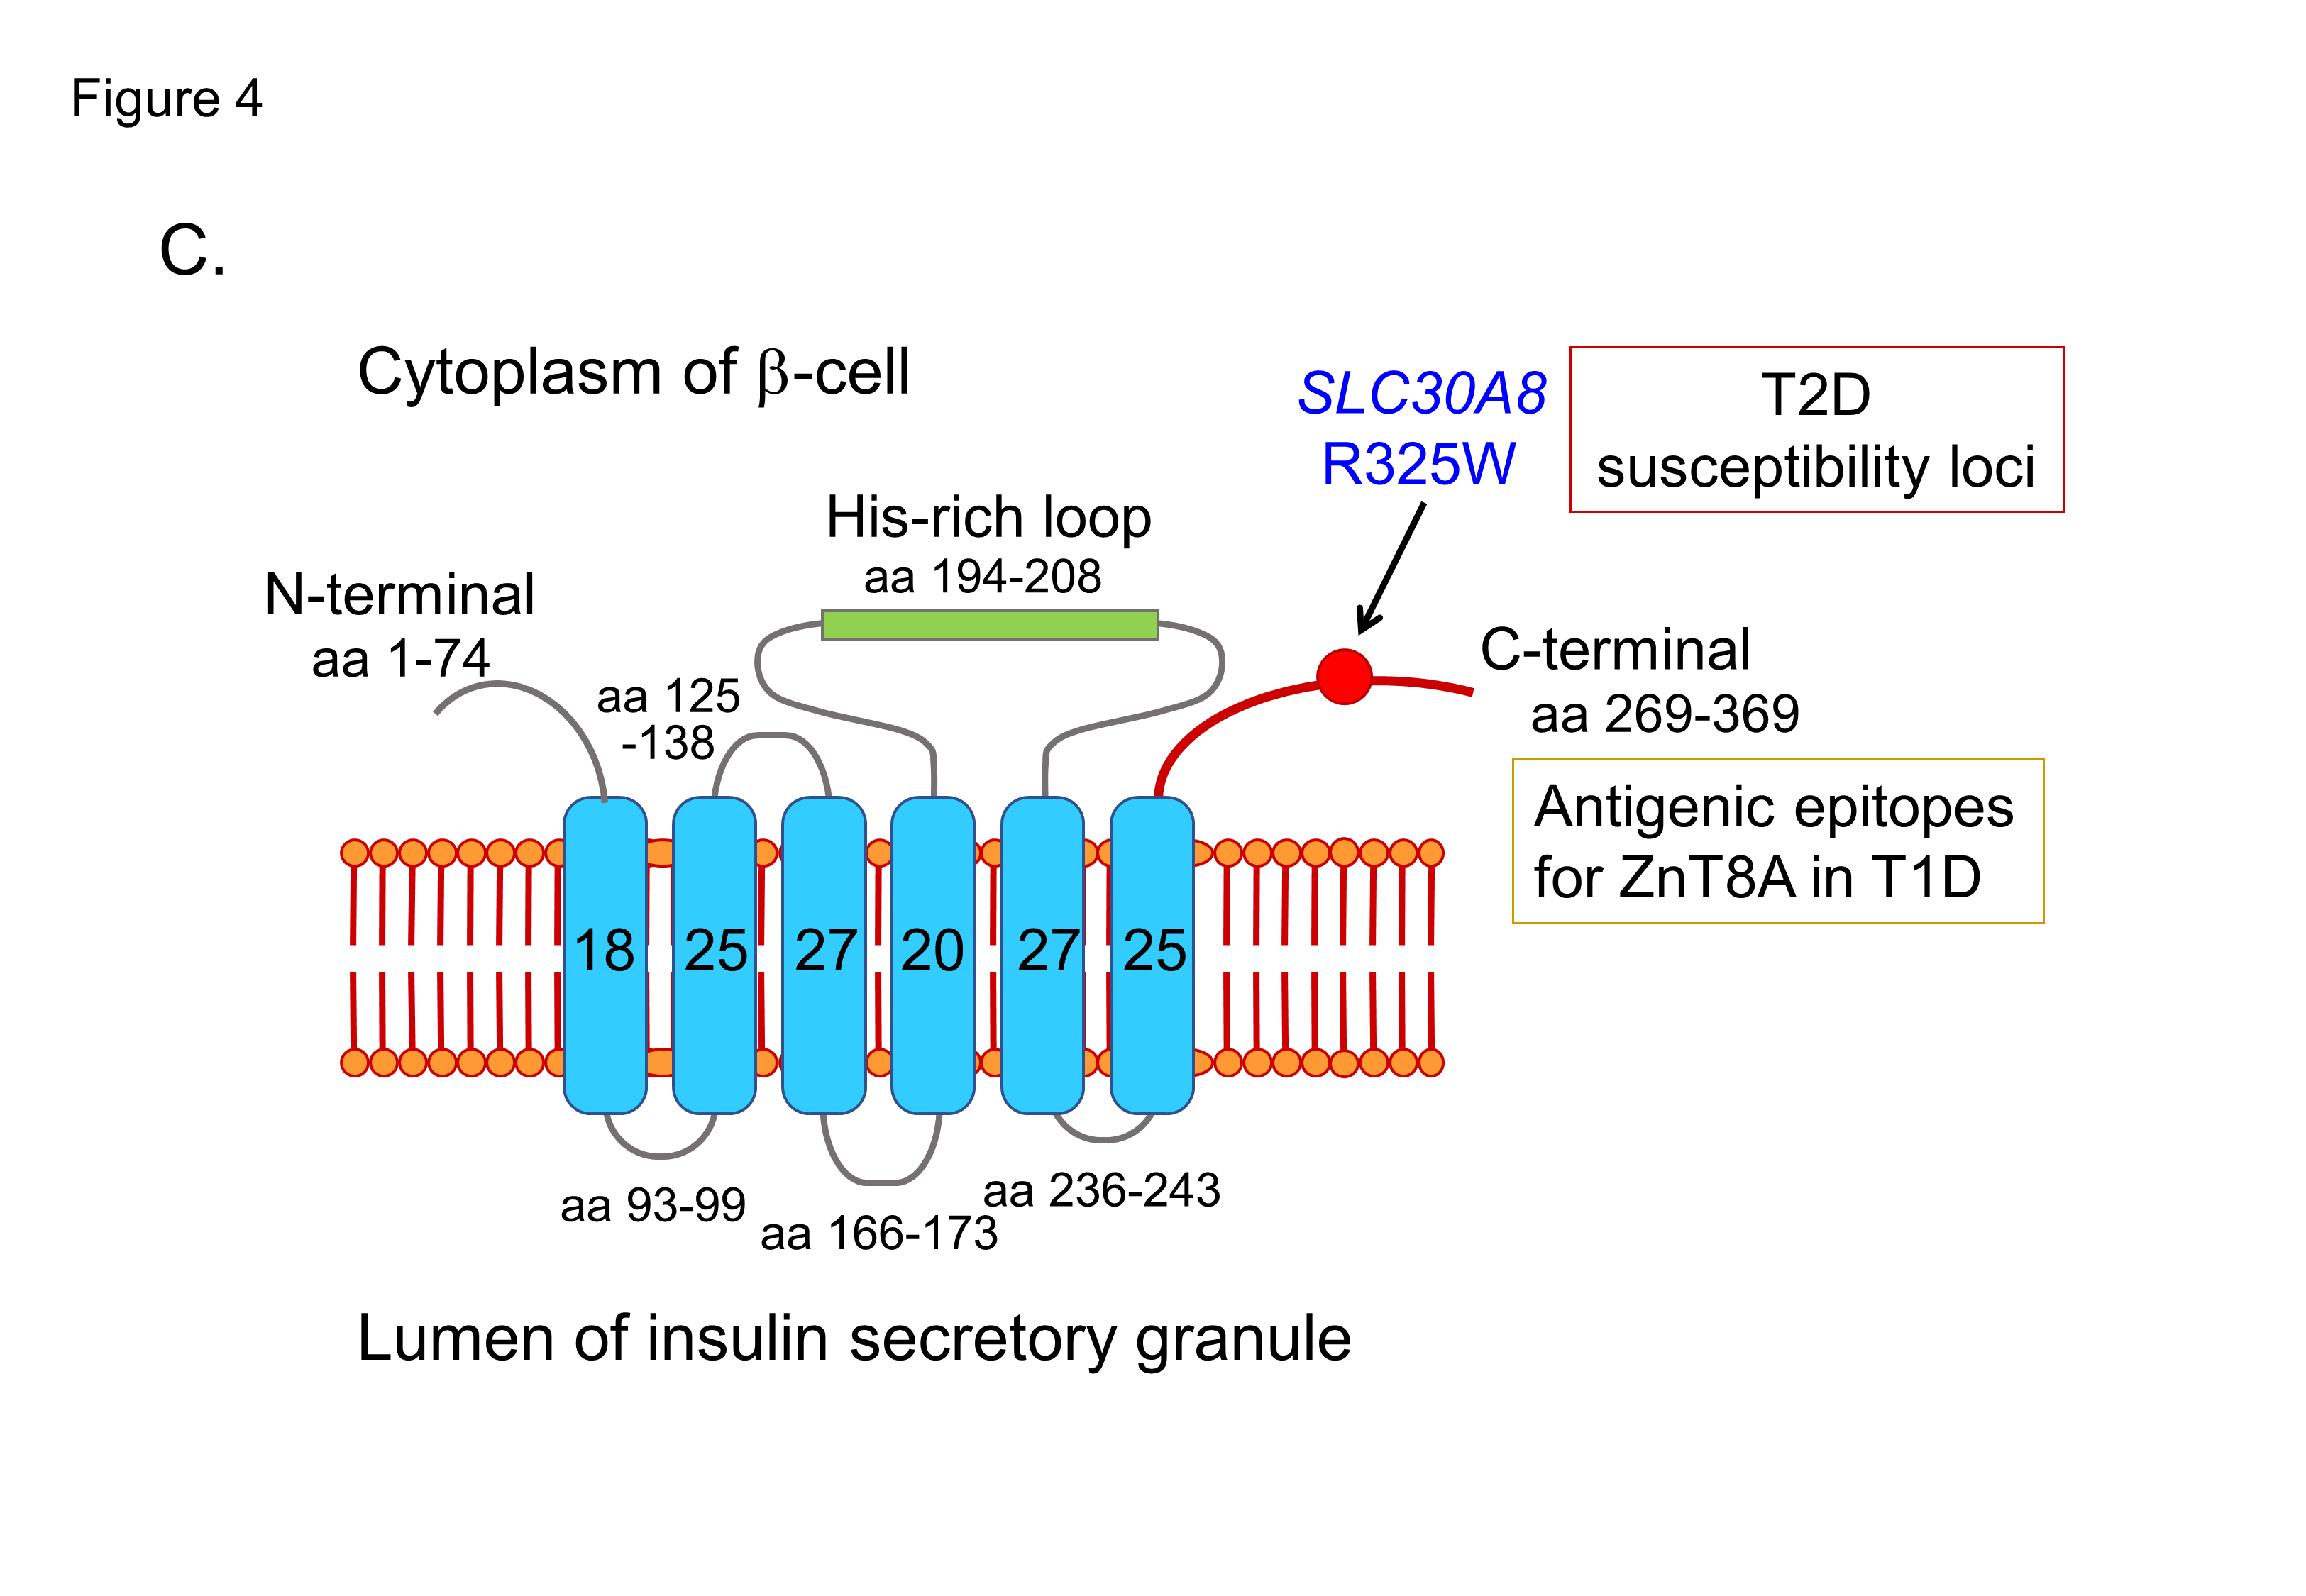

Supplement: Supplementary file 3 [file supplementary › figures and Table/Figures/Figure 4C.TIF]

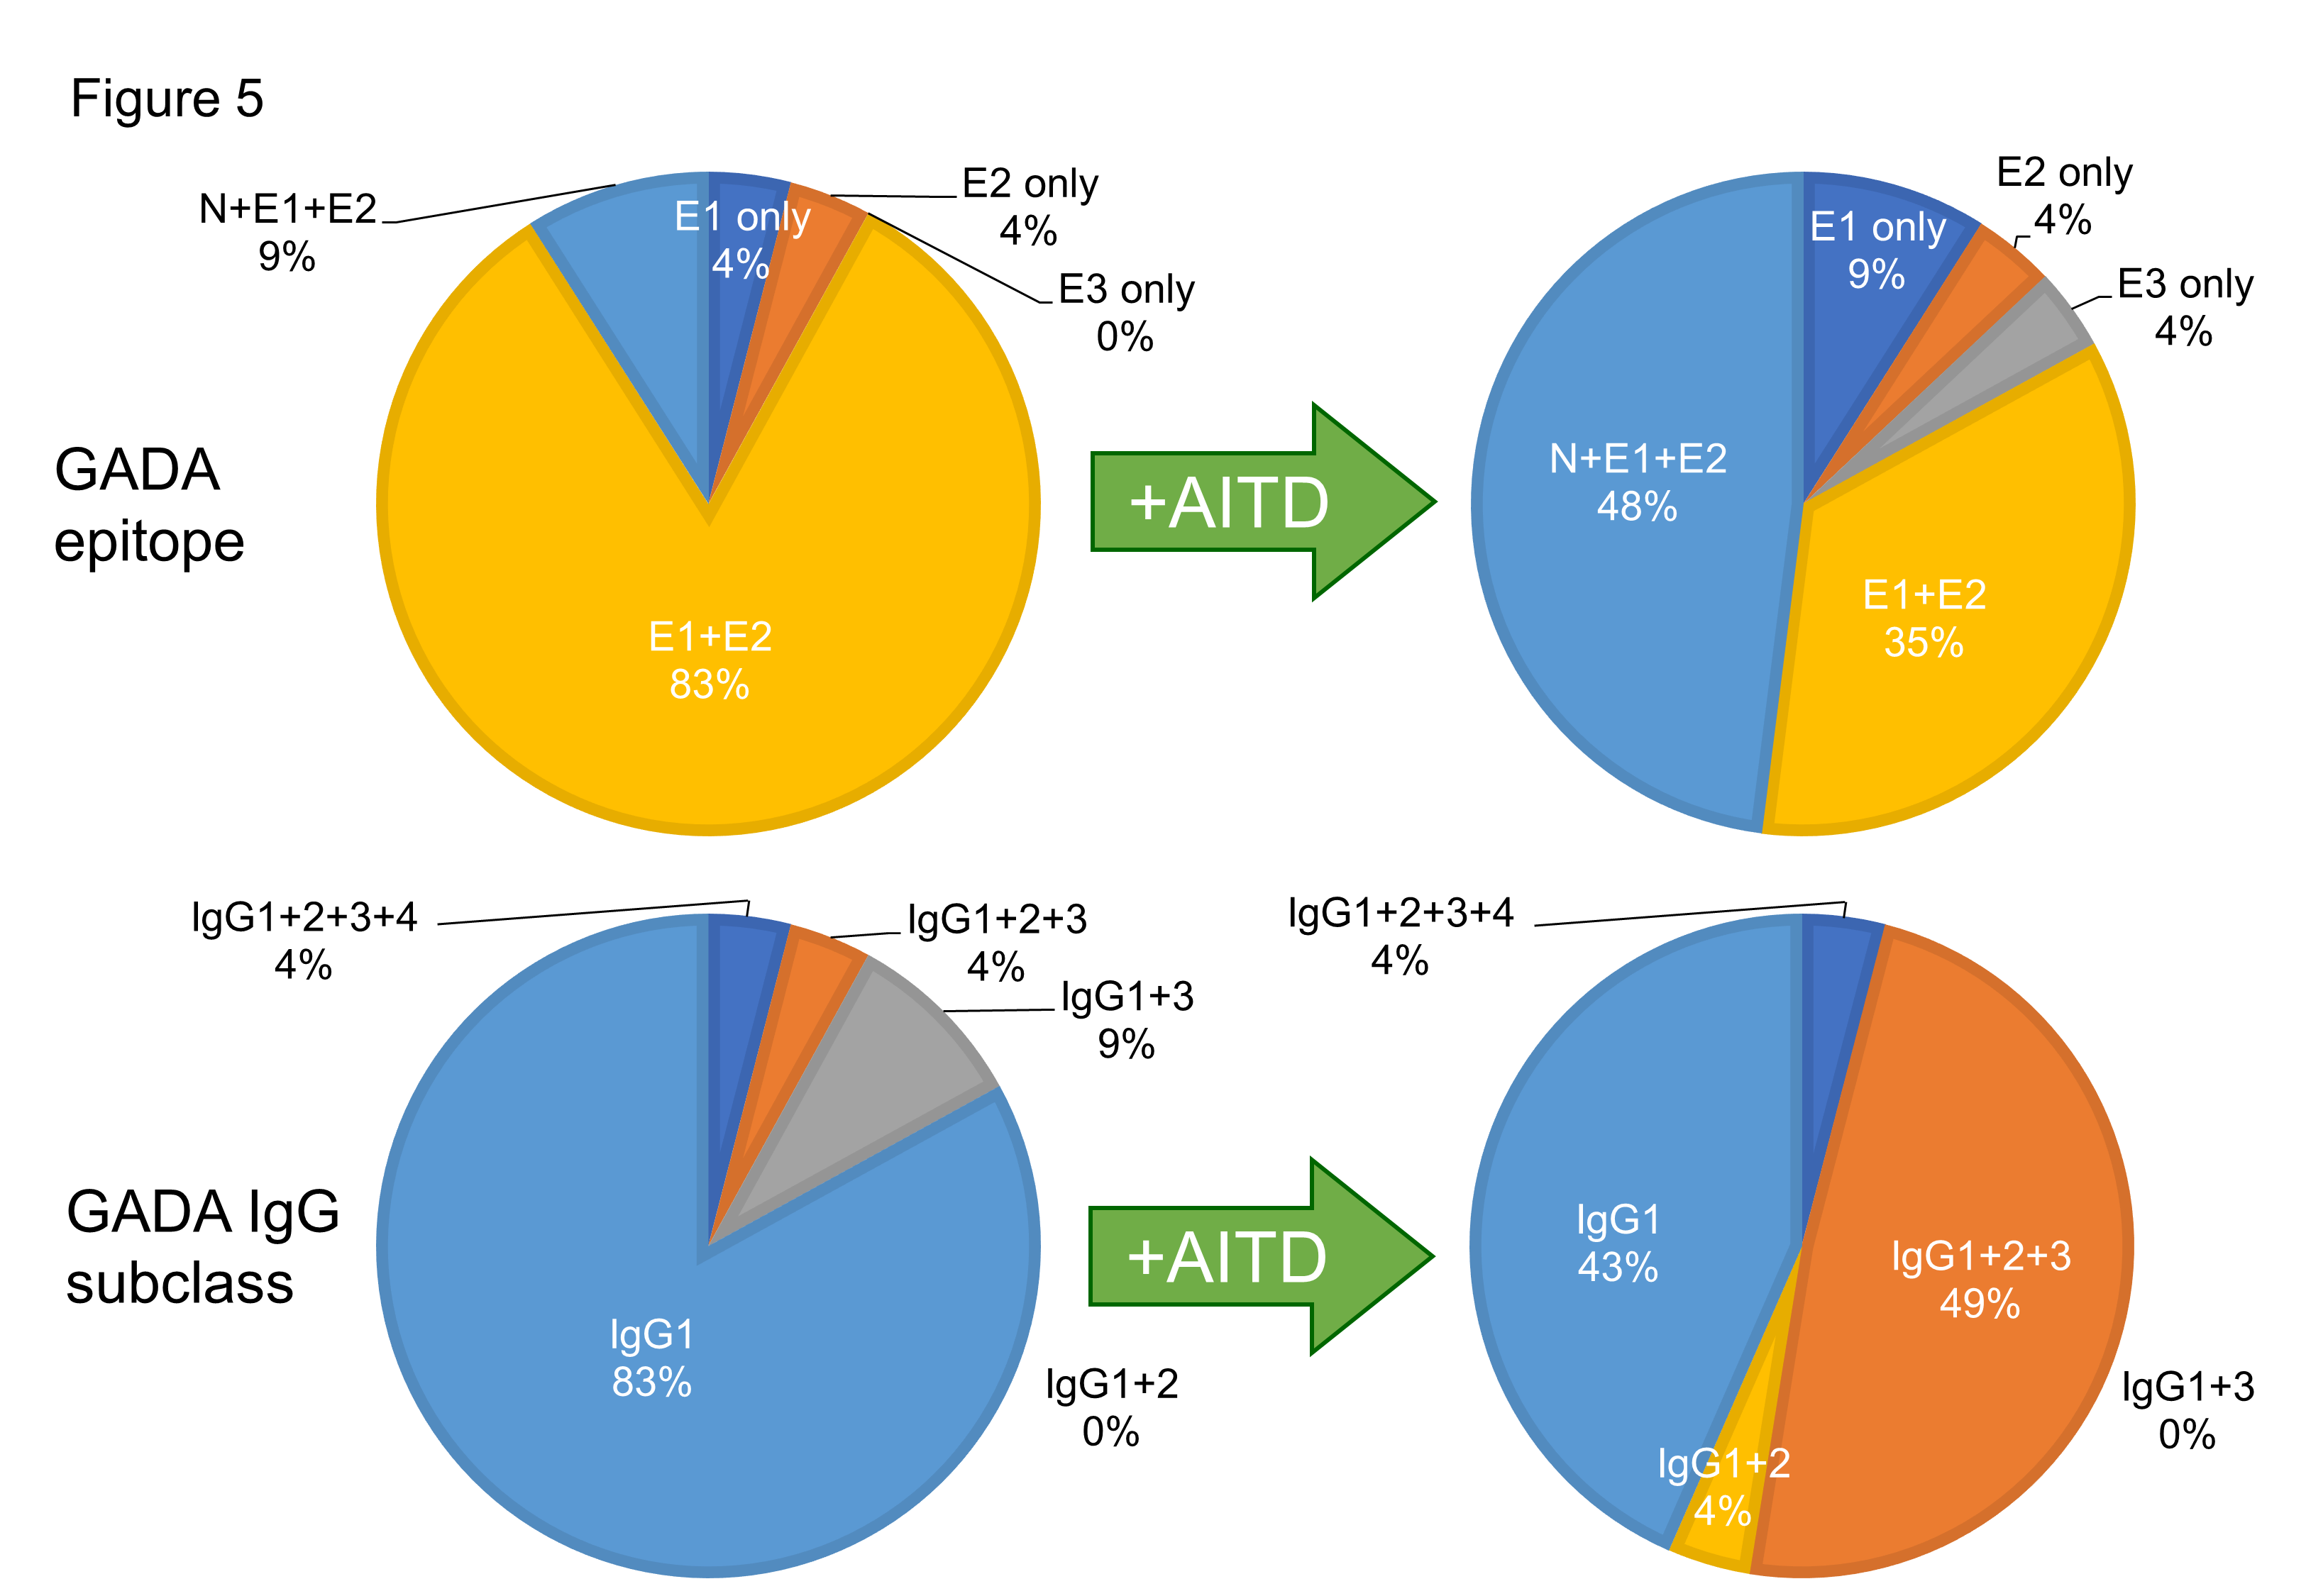

Supplement: Supplementary file 3 [file supplementary › figures and Table/Figures/Figure 5.TIF]

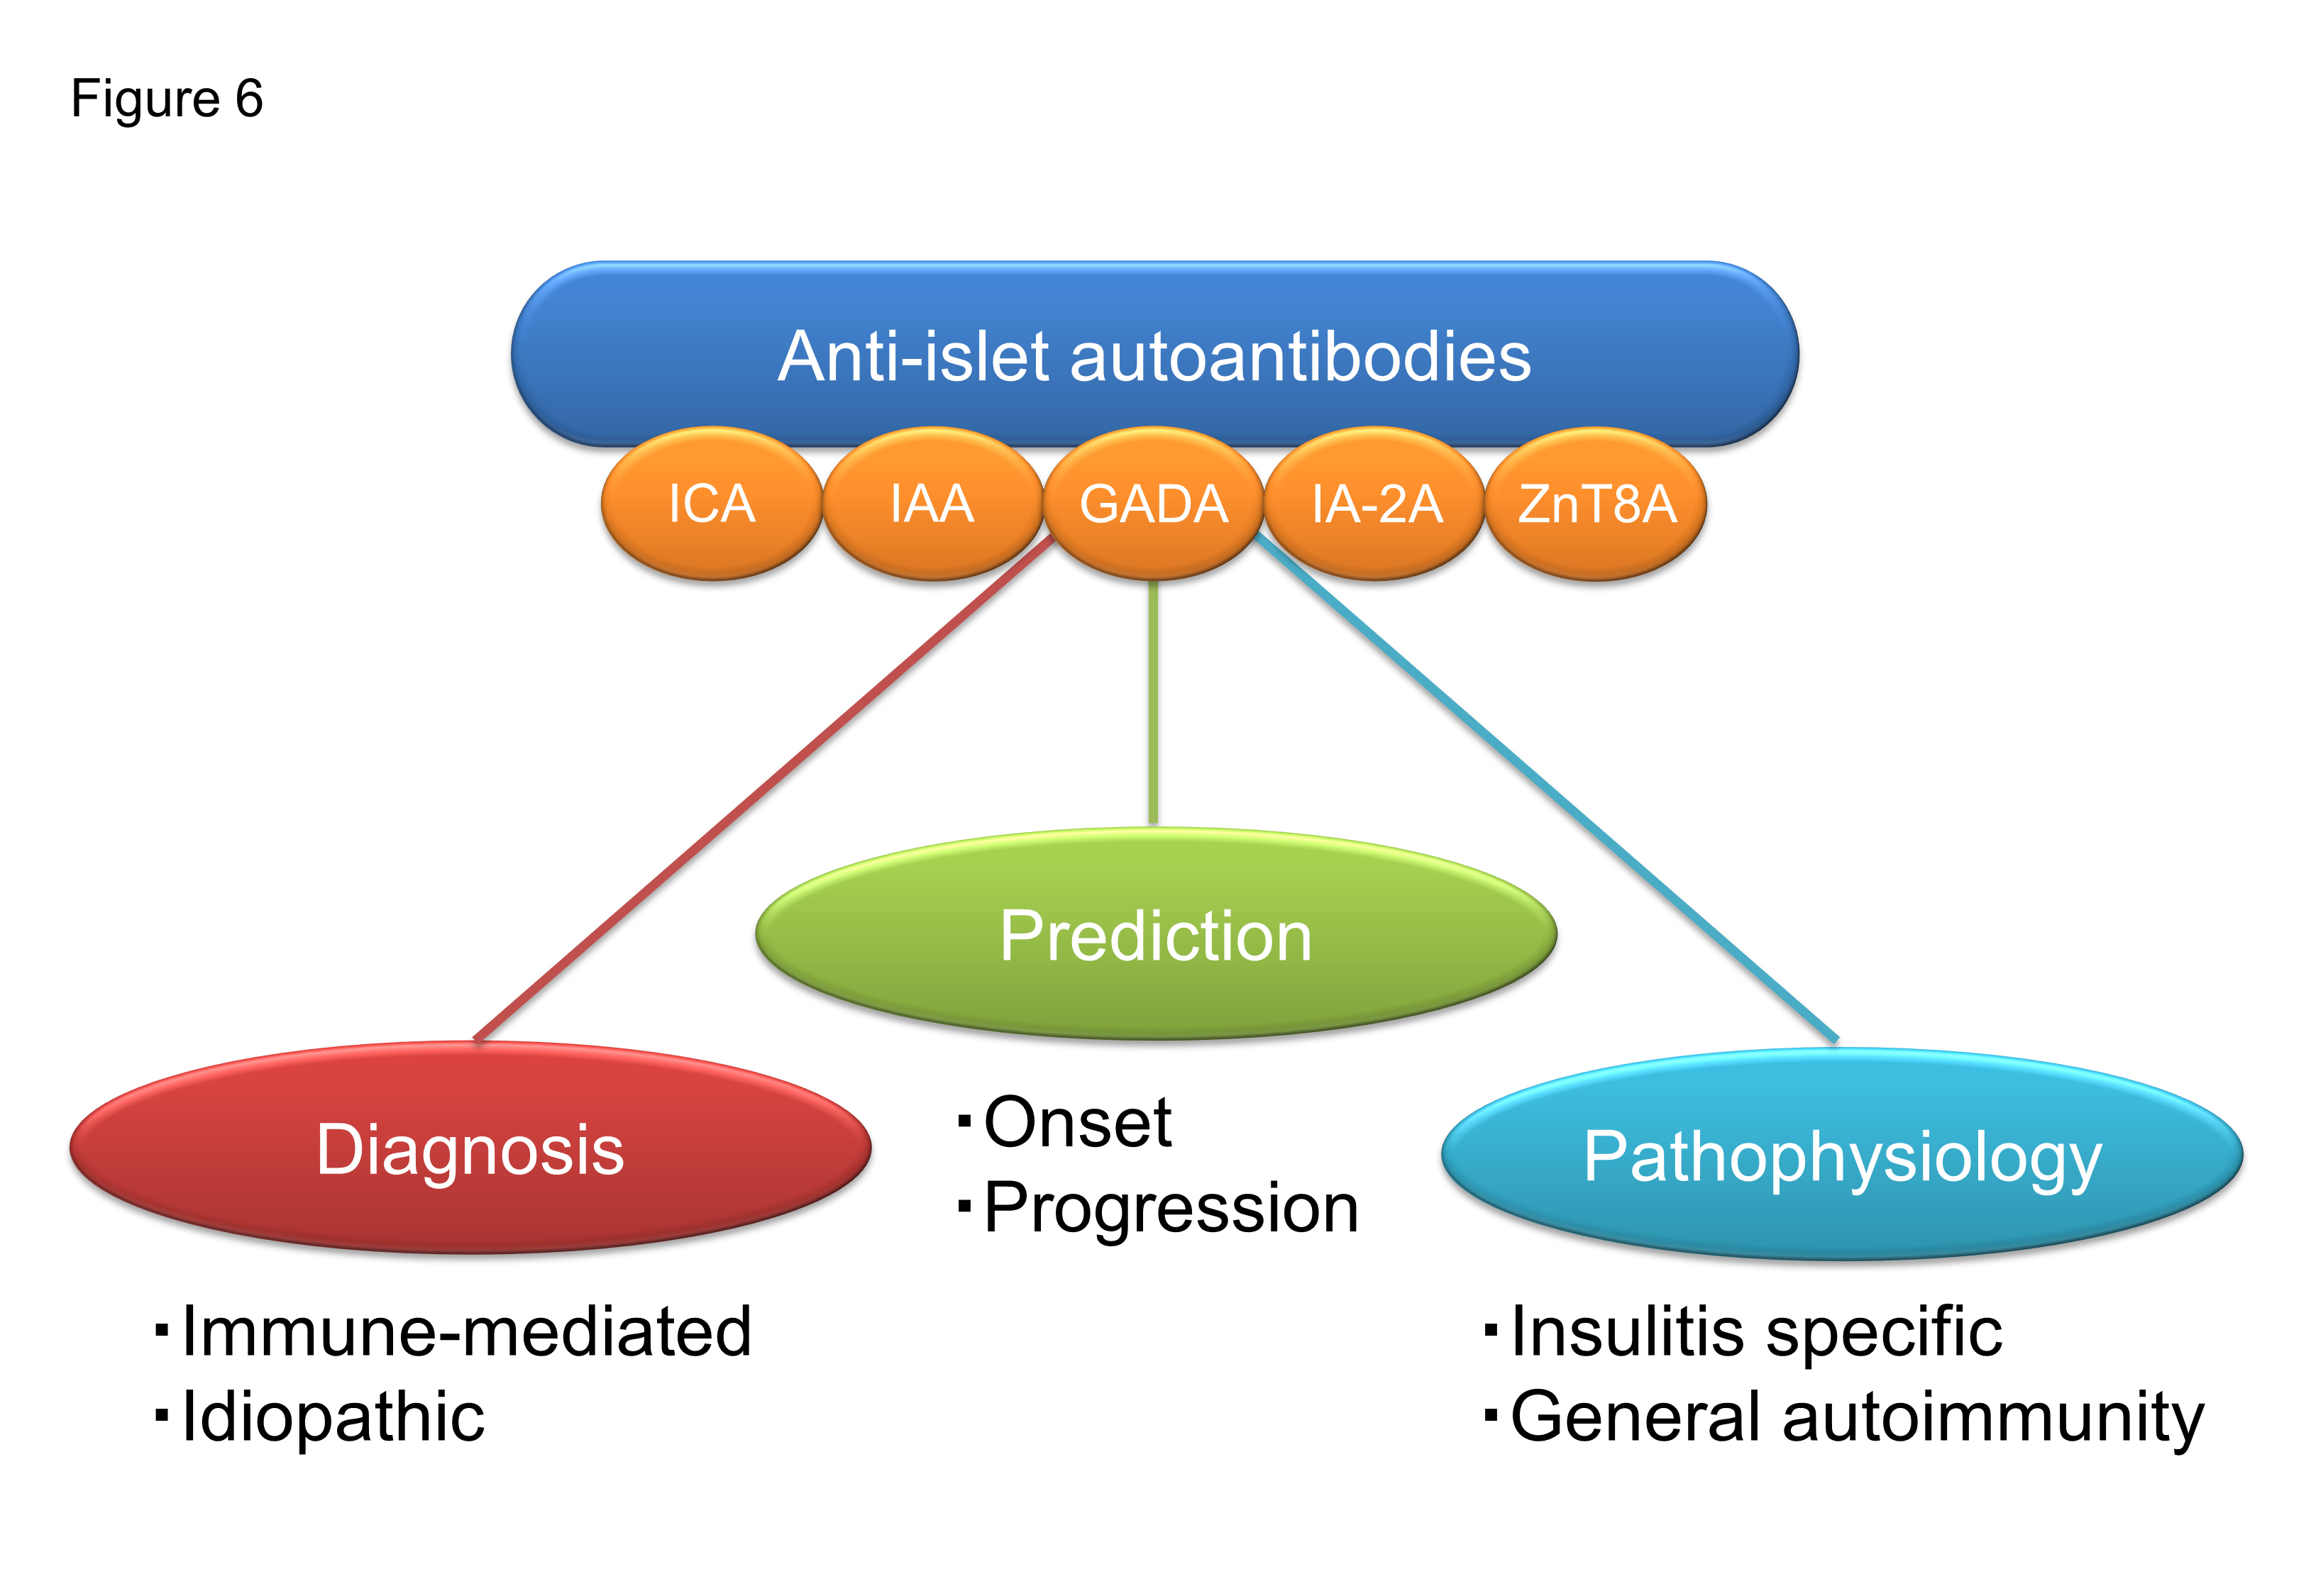

Supplement: Supplementary file 3 [file supplementary › figures and Table/Figures/Figure 6.TIF]
